# Supplementary material
Source: Springer Nature journal article supplement (https://www.springermedizin.de/resource/supplementary/12906_2012_1205_MOESM6_ESM.pdf/9520126)
Supplement: MOESM6 [file 9520126]

Table 6 Physician-recognized efficacy of Kampo medicine

| The name of Kampo medicine | Symptoms                                      | All (n=200) |      | effective                    |      |           |      |         | effective         |      |                        |      |         |
|----------------------------|-----------------------------------------------|-------------|------|------------------------------|------|-----------|------|---------|-------------------|------|------------------------|------|---------|
|                            |                                               | effective   |      | palliative care team (n=149) |      | PCU(n=46) |      | p-value | Specialists(n=75) |      | non-specialists(n=125) |      | p-value |
|                            |                                               | frequency   | %    | frequency                    | %    | frequency | %    |         | frequency         | %    | frequency              | %    |         |
| Hangeshashinto             | Diarrhea caused by chemotherapy               | 31          | 53.4 | 28                           | 18.8 | 3         | 6.5  | 1.000   | 10                | 13.3 | 21                     | 16.8 | 0.420   |
|                            | Nausea                                        | 10          | 22.2 | 10                           | 6.7  | 0         | 0.0  | 0.561   | 3                 | 4.0  | 7                      | 5.6  | 0.296   |
| Hochuekkito                | Anorexia                                      | 44          | 48.9 | 38                           | 25.5 | 6         | 13.0 | 0.231   | 14                | 18.7 | 30                     | 24.0 | 0.137   |
|                            | Fatigue                                       | 54          | 56.3 | 47                           | 31.5 | 7         | 15.2 | 0.215   | 19                | 25.3 | 35                     | 28.0 | 0.295   |
| Rikkunshito                | Nausea                                        | 36          | 43.9 | 32                           | 21.5 | 4         | 8.7  | 0.536   | 9                 | 12.0 | 27                     | 21.6 | 0.012   |
|                            | Anorexia                                      | 46          | 50.0 | 40                           | 26.8 | 6         | 13.0 | 0.773   | 18                | 24.0 | 28                     | 22.4 | 0.528   |
| Juzentaihoto               | Fatigue                                       | 50          | 56.8 | 46                           | 30.9 | 4         | 8.7  | 0.116   | 17                | 22.7 | 33                     | 26.4 | 0.508   |
|                            | AE caused by chemotherapy or radiotherapy     | 27          | 46.6 | 23                           | 15.4 | 4         | 8.7  | 0.737   | 7                 | 9.3  | 20                     | 16.0 | 0.106   |
| Yokukansan                 | Delirium                                      | 38          | 63.3 | 27                           | 18.1 | 11        | 23.9 | 0.764   | 18                | 24.0 | 20                     | 16.0 | 0.433   |
|                            | Anxiety                                       | 15          | 30.0 | 12                           | 8.1  | 3         | 6.5  | 0.507   | 6                 | 8.0  | 9                      | 7.2  | 0.758   |
| Shakuyakukanzoto           | Leg cramps                                    | 79          | 82.3 | 65                           | 43.6 | 14        | 30.4 | 0.184   | 36                | 48.0 | 43                     | 34.4 | 0.794   |
|                            | Abdominal pain                                | 20          | 35.1 | 17                           | 11.4 | 3         | 6.5  | 0.730   | 11                | 14.7 | 9                      | 7.2  | 0.268   |
| Daikenchuto                | Ileus                                         | 101         | 78.9 | 81                           | 54.4 | 19        | 41.3 | 0.358   | 35                | 46.7 | 66                     | 52.8 | 0.263   |
|                            | Opioid-caused constipation and abdominal pain | 62          | 53.9 | 50                           | 33.6 | 12        | 26.1 | 0.724   | 22                | 29.3 | 40                     | 32.0 | 0.254   |
| Goshajinkigan              | Numbness of hands and feet                    | 47          | 43.9 | 41                           | 27.5 | 6         | 13.0 | 1.000   | 18                | 24.0 | 29                     | 23.2 | 0.840   |
|                            | Nocturia                                      | 13          | 21.7 | 13                           | 8.7  | 0         | 0.0  | 0.197   | 4                 | 5.3  | 9                      | 7.2  | 0.358   |

\*Multiple answers allowed
